# Supplementary material
Source: publisher site journal article supplement (https://www.dovepress.com/article/420921)
Supplement: Supplementary file 1 [file get_supplementary_file.php]

**Supplementary Figure 1 : Consensus Questionnaire**

**1. Defining the Middle Eastern aesthetic population**

How best to describe Middle Eastern beauty ideals?

How best to describe Middle Eastern facial characteristics?

**2. Toxin characteristics influencing selection**

Which are the most widely used formulations in the Middle East?

Which factors influence selection and why?

Immunogenicity

Dilution/diffusion

Reconstitution

Safety

Storage

Cost

**3. Recommendations for pre-operative counselling**

What should be discussed with the patient prior to any procedure?

**4. Treatment indications and anatomical considerations**

Which treatment indications are most frequently requested by Middle Eastern populations?

What anatomical considerations influence treatment in Middle Eastern populations?

Do Middle Eastern facial characteristics/anatomy influence dosage recommendations?

**5. Off-label indications requested by Middle Eastern Populations**

What are the most frequently requested off-label indications in Middle Eastern populations?

For each indication, provide recommendations on how to treat.

**6. Recommendations for high-dose toxin treatment**

For which indications should high-dose treatment be recommended?

**7. Post-treatment advice**

What advice should be provided to the patient post-treatment?

**8. Miscellaneous recommendations/advice relating to Middle Eastern populations**
